# Supplementary material for: Zirconium complexes based on an ethylene linked amidinate–amido ligand: synthesis, characterization and ethylene polymerization
Source: Royal Society of Chemistry journal article supplement (doi:10.1039/c6nj02537d), 2016-11-25
Supplement: c6nj02537d1.pdf [file c6nj02537d1.pdf]

## Zirconium Complexes Based on the Ethylene Linked Amidinate-Amido Ligand: Synthesis, Characterization and Ethylene Polymerization

Wei Li,<sup>b</sup> Sheng-Di Bai,<sup>a</sup> Feng Su,<sup>c</sup> Shi-Fang Yuan,<sup>a</sup> Xin-E Duan<sup>a</sup> and Dian-Sheng Liu,<sup>a,\*</sup>

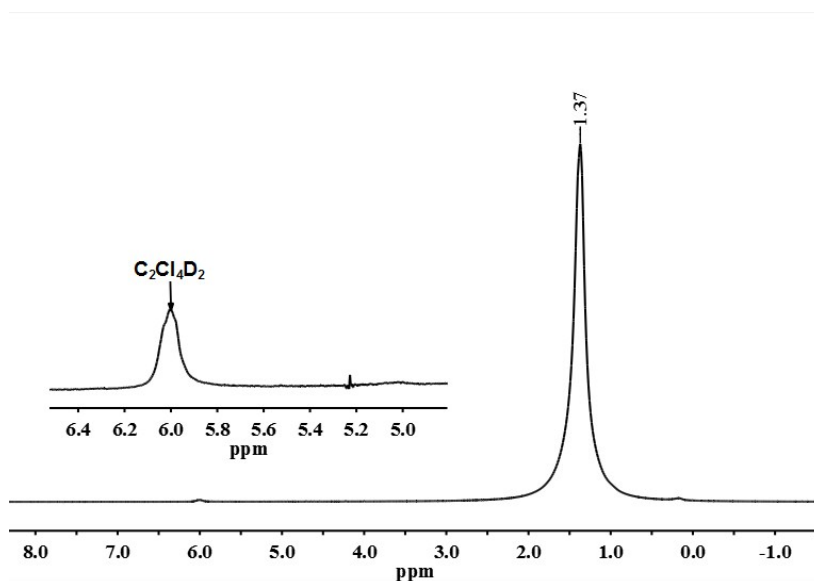

Fig. 1<sup>†</sup> <sup>1</sup>H NMR spectra of the PE sample obtained in entry 23 in Table 7.

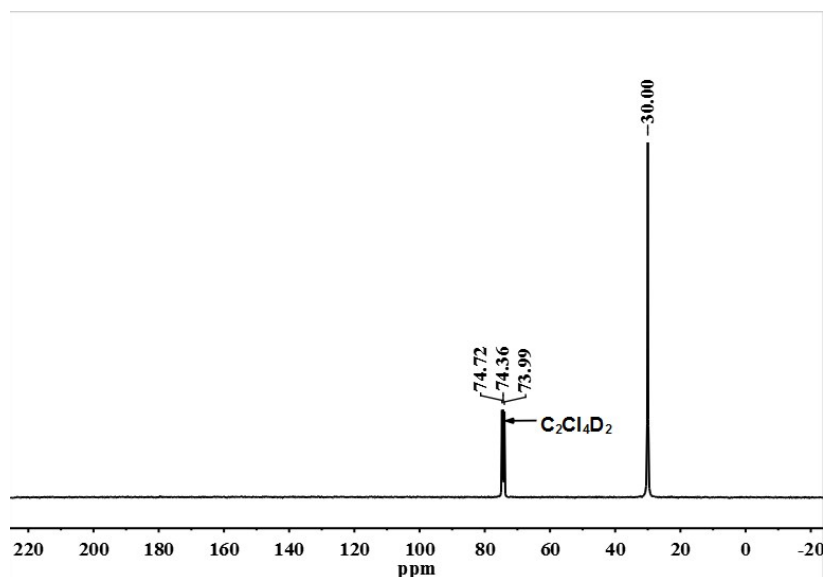

Fig. 2<sup>†</sup> <sup>13</sup>C NMR spectra of the PE sample obtained in entry 23 in Table 7.
